# Supplementary material for: Translating DREAMS into practice: Early lessons from implementation in six settings
Source: PubMed Central journal article supplement (PMC6292585; doi:10.1371/journal.pone.0208243), 2018-12-13
Supplement: pone.0208243.s019.pdf [file pone.0208243.s019.pdf]

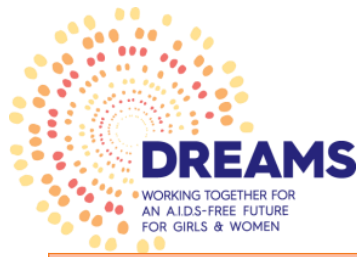

# PEPFAR DREAMS : the commitment remains both in funding and in focus

|                             | Year 1             | Year 2             | Year 3 (COP 17)    | Year 4 (Planned COP 18--TBC) |
|-----------------------------|--------------------|--------------------|--------------------|------------------------------|
| DREAMS                      |                    | FY17               | FY18               | FY19                         |
| Kenya                       | 19,742,670         | 19,742,670         | 29,242,670         | 29,242,670                   |
| Lesotho                     | 7,017,660          | 7,017,660          | 10,017,660         | 10,017,660                   |
| Malawi                      | 7,017,790          | 7,017,790          | 7,017,740          | 7,017,740                    |
| Mozambique                  | 10,195,770         | 10,195,770         | 10,195,770         | 10,195,770                   |
| South Africa                | 33,323,381         | 33,323,381         | 33,323,381         | 33,323,381                   |
| Swaziland                   | 5,009,695          | 5,009,695          | 5,009,695          | 5,009,695                    |
| Tanzania                    | 8,163,178          | 8,163,178          | 18,163,178         | 18,163,178                   |
| Uganda                      | 15,717,403         | 15,717,403         | 15,717,403         | 15,717,403                   |
| Zambia                      | 8,124,208          | 8,124,208          | 13,124,208         | 13,124,208                   |
| Zimbabwe                    | 10,310,785         | 10,310,785         | 15,310,785         | 15,310,785                   |
| DREAMS Innovation Challenge |                    | 80,000,000         |                    |                              |
| DREAMS-like                 |                    |                    |                    |                              |
| Botswana                    |                    |                    | 4,792,016          | 4,792,016                    |
| Cote D'Ivoire               |                    |                    | 10,000,000         | 10,000,000                   |
| Haiti                       |                    |                    | 2,000,000          | 2,000,000                    |
| Namibia                     |                    |                    | 10,000,000         | 10,000,000                   |
| Rwanda                      |                    |                    | 5,000,000          | 5,000,000                    |
| <b>Total</b>                | <b>124,622,540</b> | <b>204,622,540</b> | <b>188,914,506</b> | <b>188,914,506</b>           |

**Determined Resilient Empowered AIDS-Free Mentored Safe**
